# Supplementary material
Source: MDPI journal article supplement (https://www.mdpi.com/2073-445X/8/10/145)
Supplement: s1 [file s1]

# Supplementary Materials: Planning for Democracy in Protected Rural Areas: Application of a Voting Method in a Spanish-Portuguese Reserve

Mónica de Castro-Pardo <sup>1</sup>, Fernando Pérez-Rodríguez <sup>2</sup>, José María Martín-Martín <sup>3,\*</sup> and João C. Azevedo <sup>4</sup>

**Table S1.** Example of questionnaire for “Estudio sobre la ordenación integrada de los Parques Naturales de la Reserva de la Biosfera Transfronteriza Meseta Ibérica”. This is an English translation to of the original questionnaire in Spanish and Portuguese.

| Principal                                                                                                                      |  |
|--------------------------------------------------------------------------------------------------------------------------------|--|
| Ranked by importance, attributing a value of 1 to the most important criteria and a value of 4 to the least important criteria |  |
| CONSERVATION                                                                                                                   |  |
| LAND USE                                                                                                                       |  |
| DEVELOPMENT                                                                                                                    |  |
| GOVERNANCE                                                                                                                     |  |
| CONSERVATION:                                                                                                                  |  |
| Ranked by importance, attributing a value of 1 to the most important criteria and a value of 7 to the least important criteria |  |
| FAUNA                                                                                                                          |  |
| FLORA                                                                                                                          |  |
| ATMOSPHERE/CLIMATE                                                                                                             |  |
| WATER                                                                                                                          |  |
| GEOLOGY, GEOMORPHOLOGY, AND SOILS                                                                                              |  |
| LANDSCAPE AND CONNECTIVITY                                                                                                     |  |
| FIRE                                                                                                                           |  |
| LAND USE                                                                                                                       |  |
| Ranked by importance, attributing a value of 1 to the most important criteria and a value of 4 to the least important criteria |  |
| EDUCATION                                                                                                                      |  |
| LEISURE                                                                                                                        |  |
| TOURISM                                                                                                                        |  |
| RESEARCH                                                                                                                       |  |
| DEVELOPMENT                                                                                                                    |  |
| Ranked by importance, attributing a value of 1 to the most important criteria and a value of 5 to the least important criteria |  |
| AGRICULTURE                                                                                                                    |  |
| CATTLE RAISING                                                                                                                 |  |
| FORESTRY                                                                                                                       |  |
| HUNTING/FISHING                                                                                                                |  |
| LOCAL PROMOTION                                                                                                                |  |
| GOVERNANCE                                                                                                                     |  |
| Ranked by importance, attributing a value of 1 to the most important criteria and a value of 4 to the least important criteria |  |
| ENGAGEMENT                                                                                                                     |  |

|              |  |
|--------------|--|
| CONNECTIVITY |  |
| SIMPLICITY   |  |
| GUARANTY     |  |

Ranked by importance the following criteria and sub-criteria in each box. The most important position is always indicated by a value of 1.
